# Supplementary material for: Synthesis of monodisperse magnetic restricted microspheres for recognition of thiamphenicol in milk
Source: Royal Society of Chemistry journal article supplement (doi:10.1039/d0ra10268g), 2021-01-01
Supplement: d0ra10268g1.pdf [file d0ra10268g1.pdf]

## **Synthesis of Monodisperse Magnetic Restricted Microspheres for Recognition of Thiamphenicol in Milk**

Shuai Zhang, Huachun Liu, Tianpei Cai, Yanqiang Zhou, Jianmin Li, Xiaoxiao Wang,  
Shanwen Zhao, Chunmiao Bo and Bolin Gong\*

School of Chemistry and Chemical Engineering, North Minzu University, Yinchuan  
750021, China.

\*Prof. Bolin Gong

No. 204 Wenchang North Street, Xixia District, Yinchuan City, China

Tel: +86-0951-2067917

Fax: +86-0951-2067917

E-mail: [gongbolin@163.com](mailto:gongbolin@163.com)

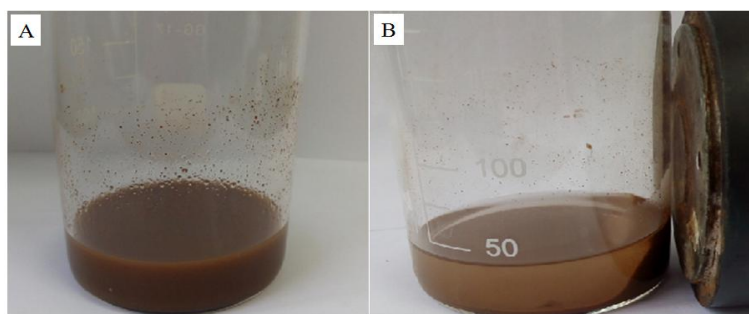

**Fig. S1.** Analysis of magnetic properties of polymers.

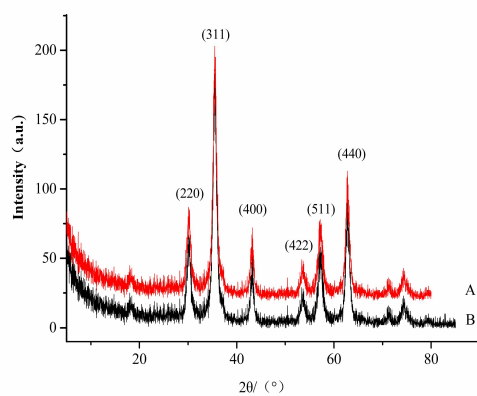

**Fig.S2.** X-ray diffraction analysis of (A)  $\text{Fe}_3\text{O}_4$ , (B) MMIPs.

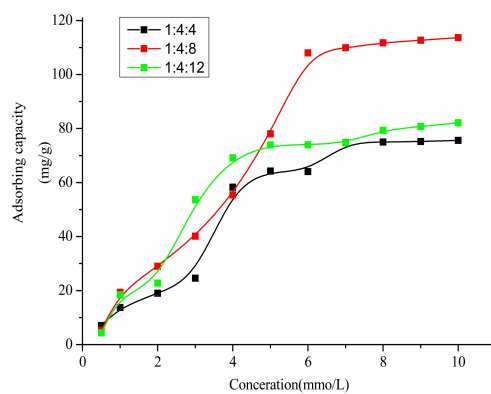

**Fig. S3.** Effects of different amounts of cross-linking agents on the adsorption capacity of MMIPs.

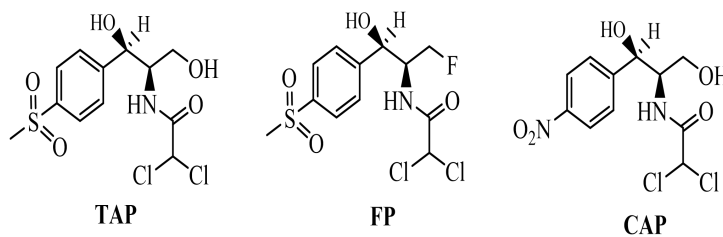

**Fig. S4.** Competitive target molecular structures.

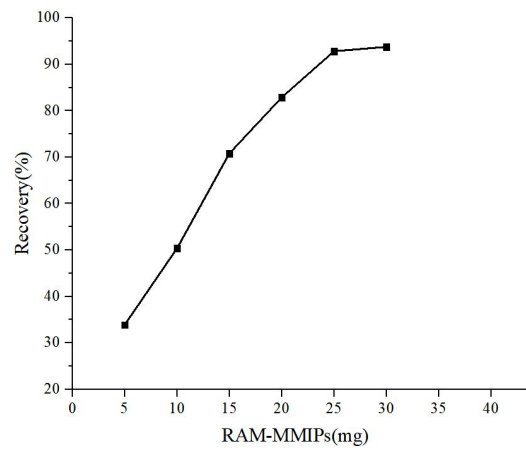

**Fig. S5.** The effects of the amounts of RAM-MMIPs on spiked milk

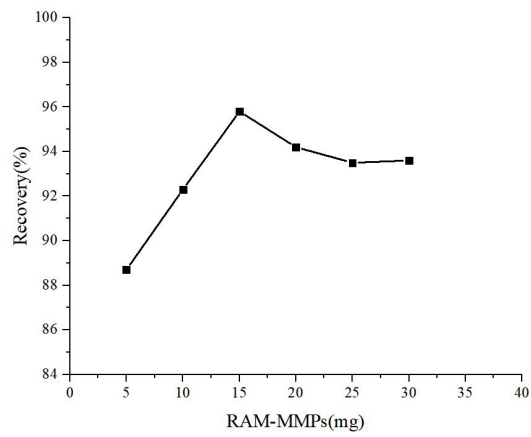

**Fig. S6.** The effects of the amounts of RAM-MMIPs on spiked river water

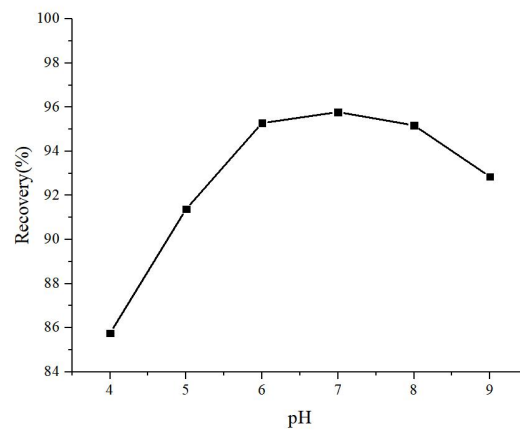

**Fig. S7.** The effects of pH of sample solution on spiked milk

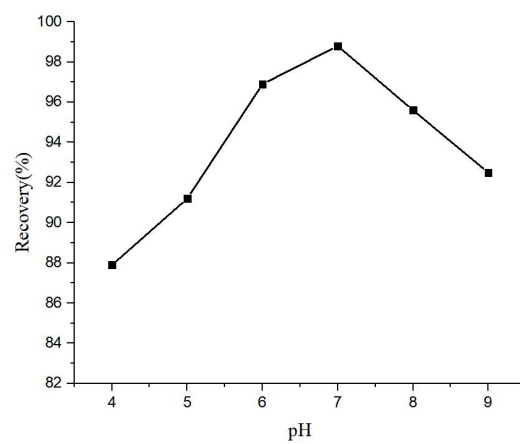

**Fig. S8.** The effects of pH of sample solution on spiked river water
